# Supplementary material for: A membrane-less desalination battery with ultrahigh energy efficiency
Source: Royal Society of Chemistry journal article supplement (doi:10.1039/d0ta12547d), 2021-01-01
Supplement: d0ta12547d1.pdf [file d0ta12547d1.pdf]

1

## Supporting Information

### 2 **A membrane-less desalination battery with ultrahigh energy efficiency**

3 Lu Guo<sup>1</sup>, Yang Shang<sup>1</sup>, Guangzhao Wang<sup>2</sup>, Jun Jin<sup>3</sup>, Zhi Yi Leong<sup>1</sup>, Shaozhuan Huang<sup>4</sup>,  
4 Chengding Gu<sup>5</sup>, Meng Ding<sup>1</sup>, Mei Er Pam<sup>1</sup>, Sareh Vafakhah<sup>1</sup>, Xueliang Li<sup>1</sup>, Shengyuan A.  
5 Yang<sup>2</sup> and Hui Ying Yang \*<sup>1</sup>

6 <sup>1</sup> Pillar of Engineering Product Development, Singapore University of Technology and  
7 Design, 8 Somapah Road, 487372, Singapore.

8 <sup>2</sup> Research Laboratory for Quantum Materials, Singapore University of Technology and  
9 Design, Singapore 487372, Singapore

10 <sup>3</sup> Faculty of Materials Science and Chemistry, China University of Geosciences, Wuhan,  
11 430074, China

12 <sup>4</sup> Key Laboratory of Catalysis and Energy Materials Chemistry of Ministry of Education,  
13 South-Central University for Nationalities, Wuhan, Hubei, 430074, China

14 <sup>5</sup> School of materials and energy, Yunnan University, Kunming 650091, China

15 \*Corresponding author. Tel.: +65 6303 6663; Fax: +65 6779 5161. E-mail address:  
16 yanghuiying@sutd.edu.sg (H. Y. Yang).

17

18

19

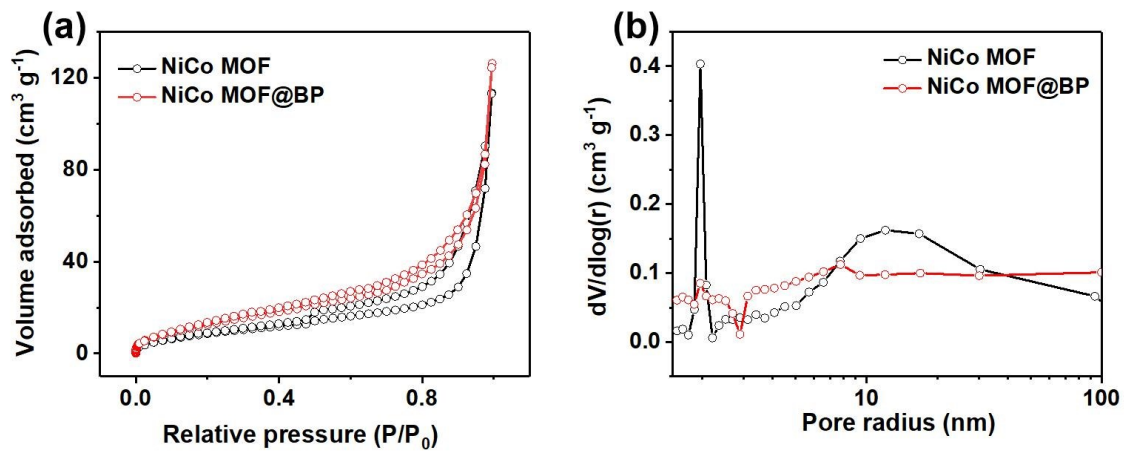

1

2 **Figure S1.** (a) Nitrogen sorption isotherms of NiCo MOF and NiCo MOF @BP. (b) BJH  
 3 pore size distributions of NiCo MOF and NiCo MOF @BP.

4

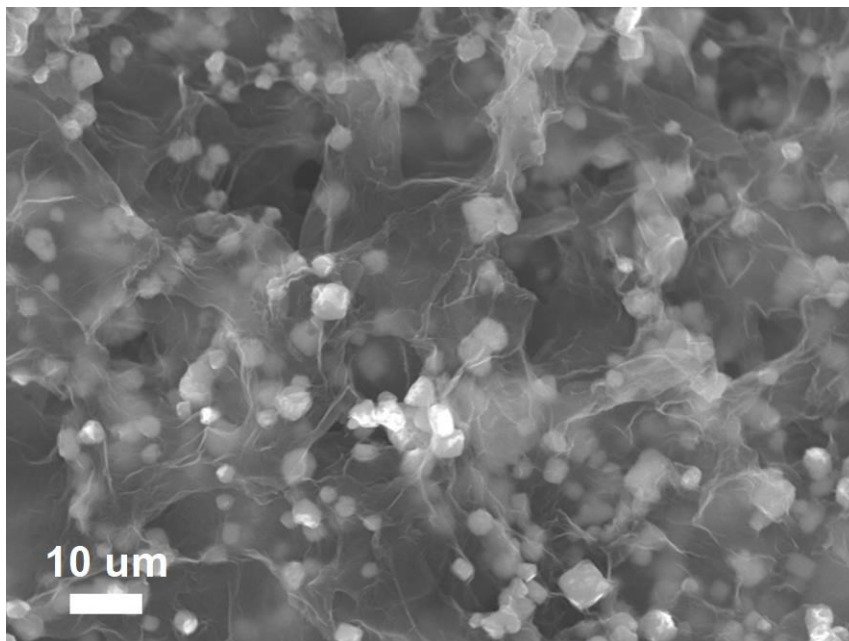

5

6 **Figure S2.** SEM image of the Ag@rGO anode.

7

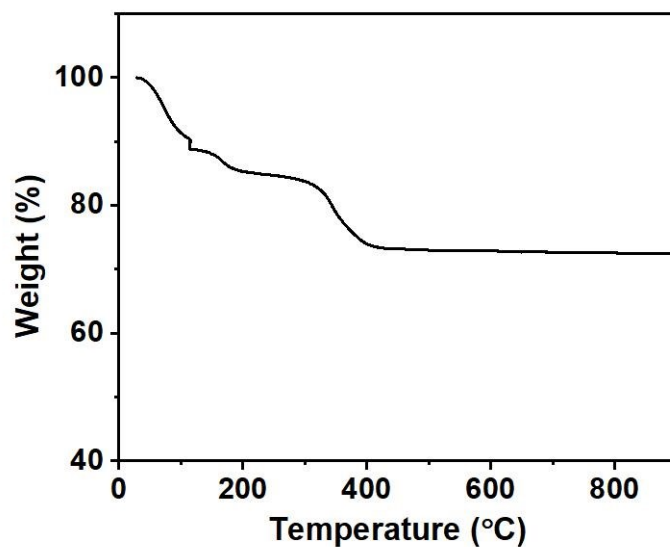

1

2 **Figure S3.** Thermogravimetric analysis (TGA) of Ag@rGO showing the weight loss in  
 3 percent.

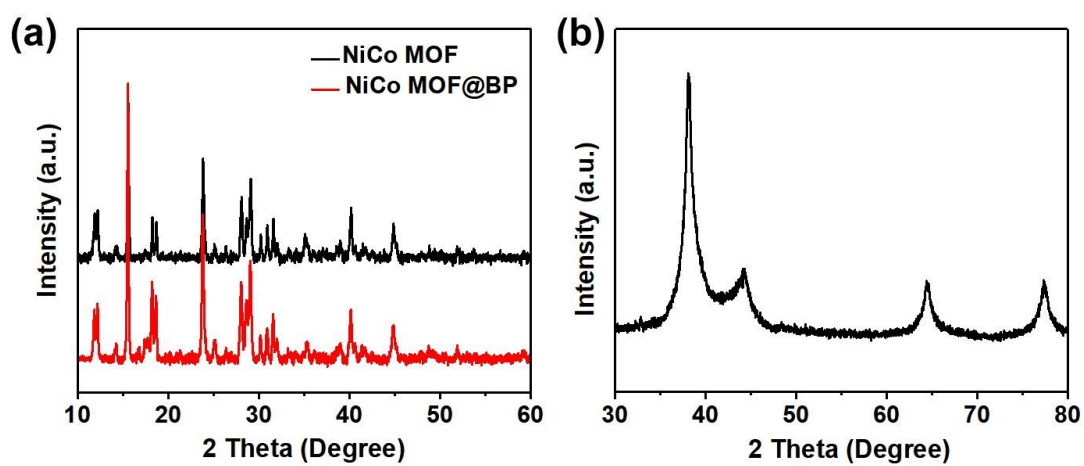

4

5 **Figure S4.** (a) Powder X-ray diffraction patterns of the as-prepared NiCo MOF, NiCo MOF  
 6 @BP and (b) Ag@rGO.

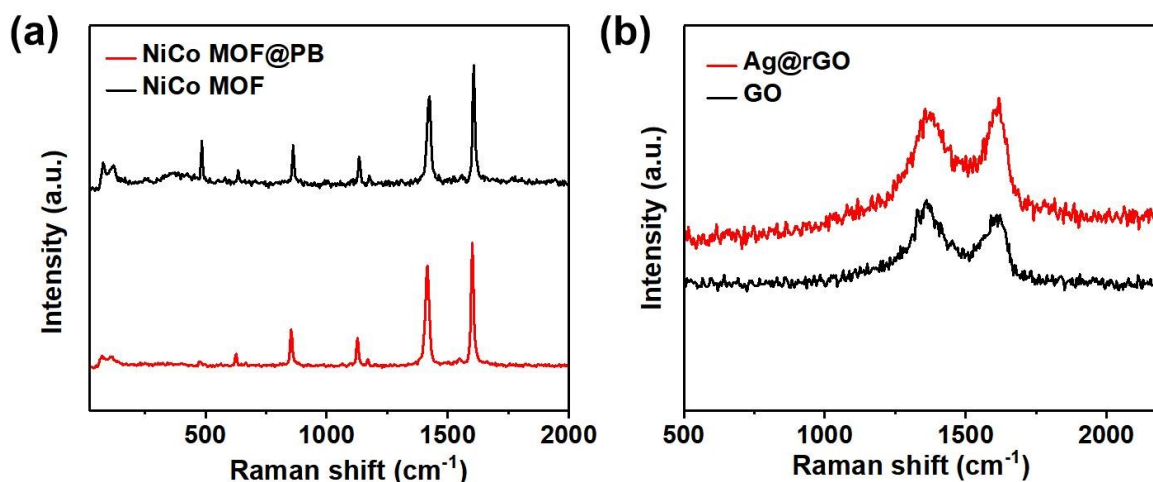

1

2 **Figure S5.** (a) Raman spectra of NiCo MOF and NiCo MOF @BP cathode. (b) Raman  
 3 spectra of Ag@3DG and GO.

4 Characteristic A1g, B2g and A2g modes belonging to BP were observed for NiCo MOF@BP  
 5 <sup>1</sup>.

6 The Raman spectra of GO and Ag@rGO were studied. Typical peaks at  $1350 \text{ cm}^{-1}$  and  $1580$   
 7  $\text{cm}^{-1}$  could be attributed to D and G bands of GO. After successful reduction, the value of  
 8  $I_D/I_G$  decreased from 1.01 to 0.99 which implied a higher degree of graphitization <sup>2</sup>.

9

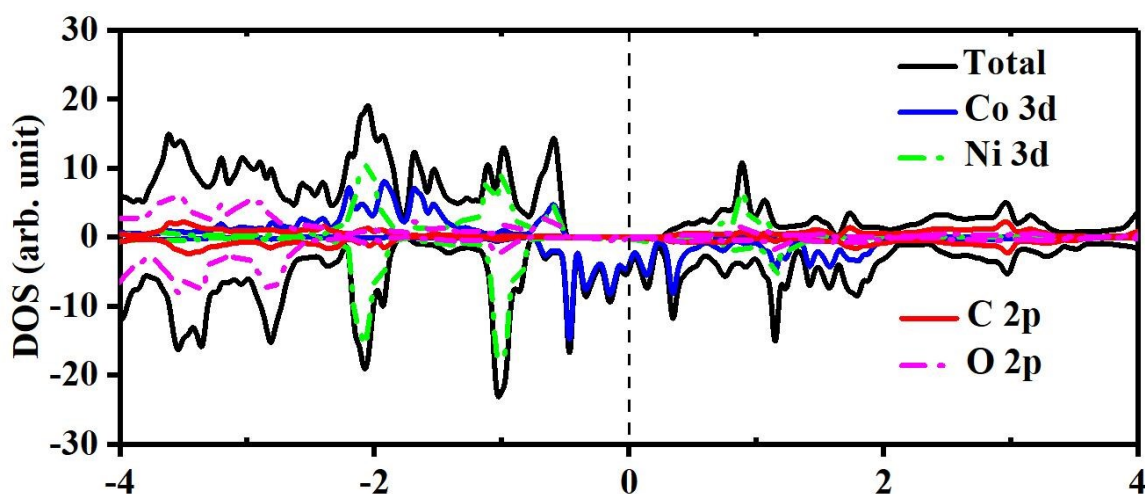

10

1 **Figure S6.** DOS of NiCo MOF. The Fermi level is set to 0.  
2 Lattice parameters calculated for NiCo MOF were  $20.06 \text{ \AA} \times 3.29 \text{ \AA} \times 6.22 \text{ \AA}$ , which agreed  
3 well with previous experimental values <sup>3</sup>. Spin up and down parts of the density of states  
4 (DOS) for NiCo MOF (Figure S6) were asymmetrical which suggested the existence of  
5 unpaired electrons. Based on these results, the total magnetic moment of NiCo MOF was  
6 calculated to be  $+6\mu\text{B}$ / supercell where the main contributions from two Co (or Ni) atoms  
7 were  $+2.51/ +2.55$  (or  $-1.50/ +1.59$ )  $\mu\text{B}$ / supercell respectively. Additionally, an energy gap  
8 of  $0.77 \text{ eV}$  appeared in the spin up states whereas no energy gap was observed in the spin  
9 down states. The asymmetrical density of states illustrated the half-metallicity nature of NiCo  
10 MOF and the compromised electrical conductivity of NiCo MOF. As such, it was reasonable  
11 to incorporate a BP scaffold to enhance its electrical conductivity.

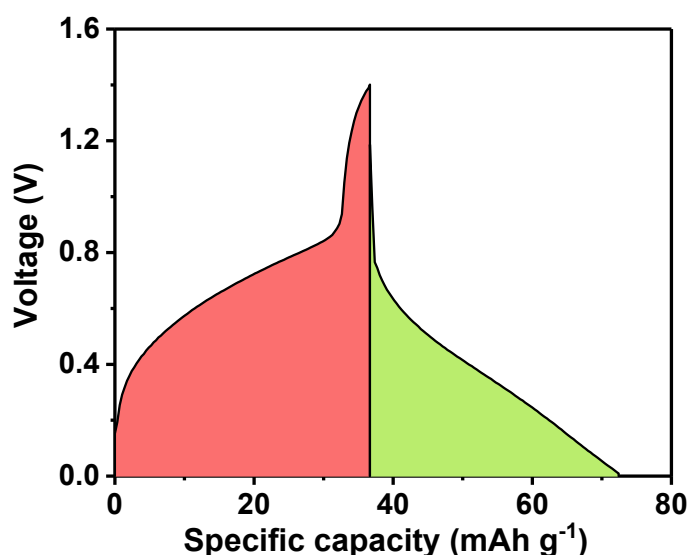

12

13 **Figure S7.** A typical galvanostatic charge/discharge curve of NiCo MOF@BP. Red region:  
14 charging process; green region: discharging process.

1

2 The chemical reaction equations of the two-stage sodium insertion/extraction process are  
3 indicated below:

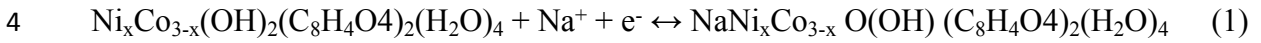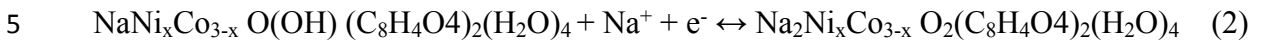

6

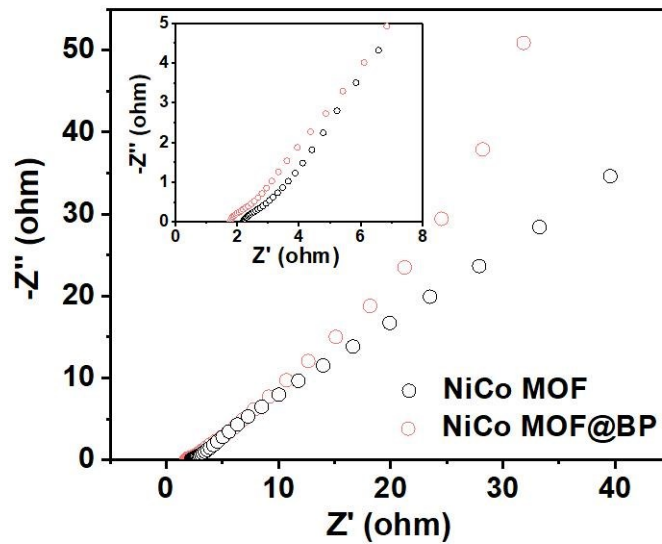

7

8 **Figure S8.** Nyquist spectra of NiCo MOF and NiCo MOF@BP after 20<sup>th</sup> cycle.

9 Both cathodes show good electrical conductivity as indicated by their Nyquist plots.

10 Understandably, the presence of BP in NiCo MOF@BP composite results in a slightly

11 smaller interfacial resistance ( $R_s$ ) and charge transfer resistance ( $R_{ct}$ ).

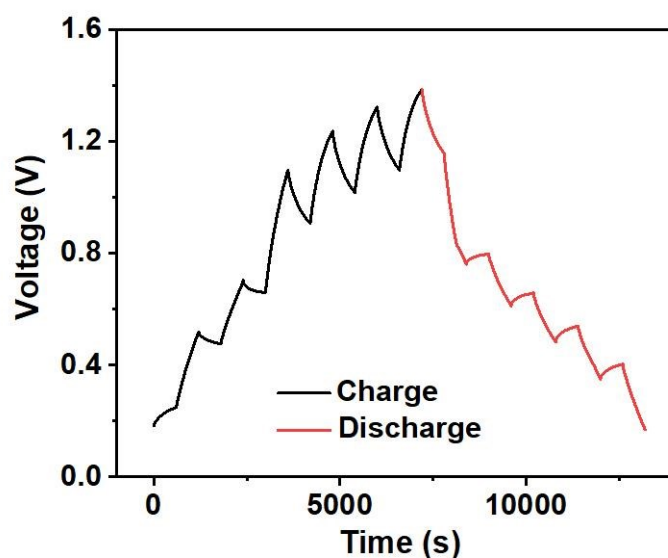

1

2 **Figure S9.** Galvanostatic intermittent titration technique (GITT) profiles of the NiCo MOF  
 3 cathode in the desalination battery using a pulse current of 80 mA g<sup>-1</sup> for 10min and intervals  
 4 of 10 min in a stable cycle after 1-cycle activation process.

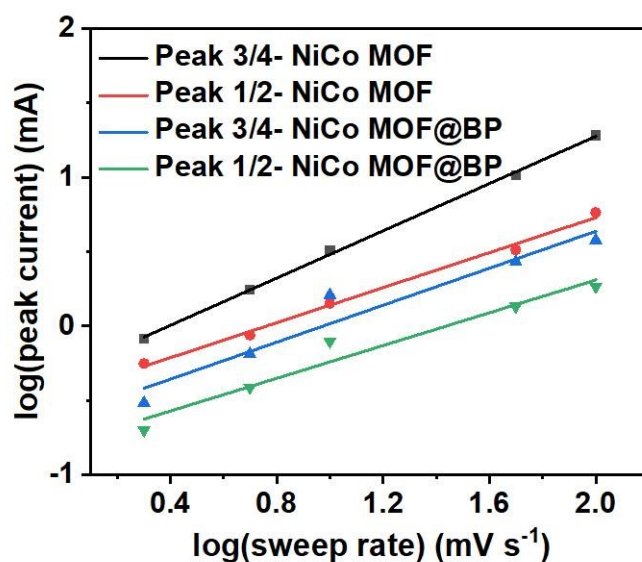

5

6 **Figure S10.** Log i-log v plots at two redox peaks of NiCo MOF and NiCo MOF @BP at  
 7 various scan rates.

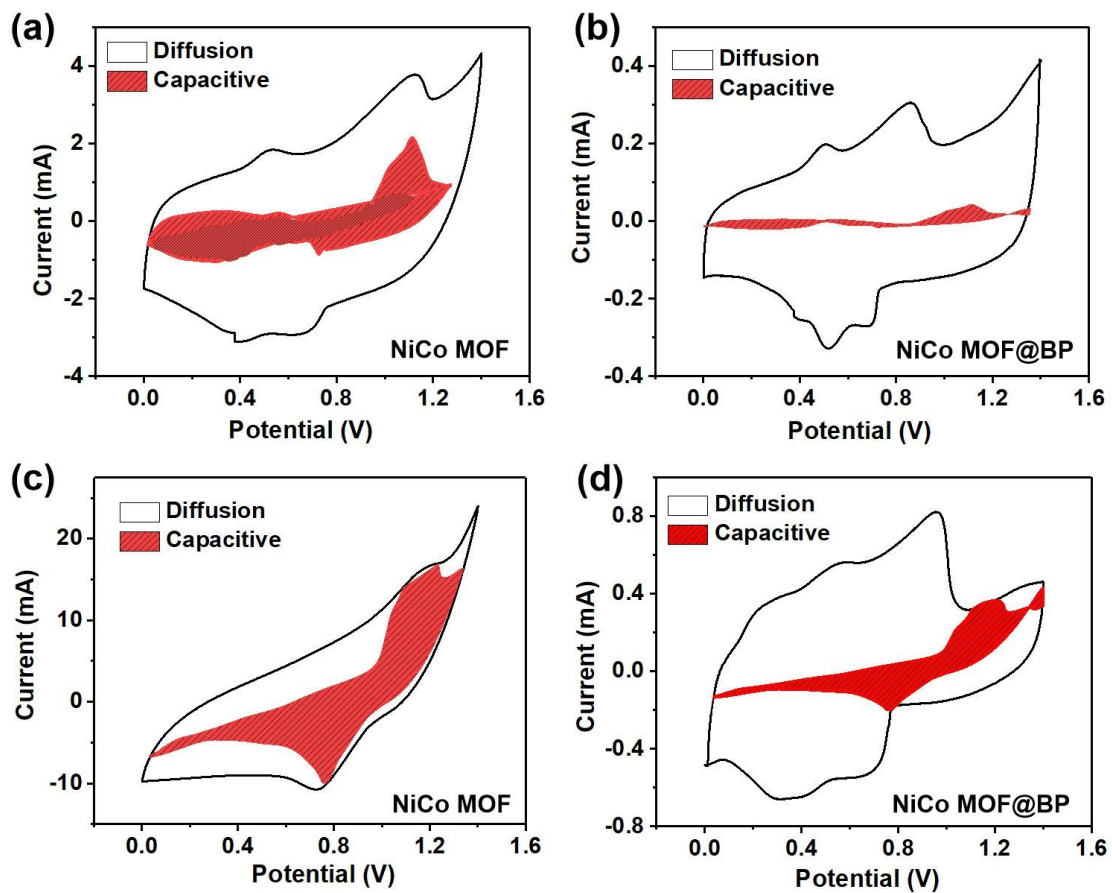

1

2 **Figure S11.** (a, b) CV curves indicate the surface capacitive contribution of NiCo MOF and  
 3 NiCo MOF @BP at 2 and 100 mV s<sup>-1</sup>.

4

5



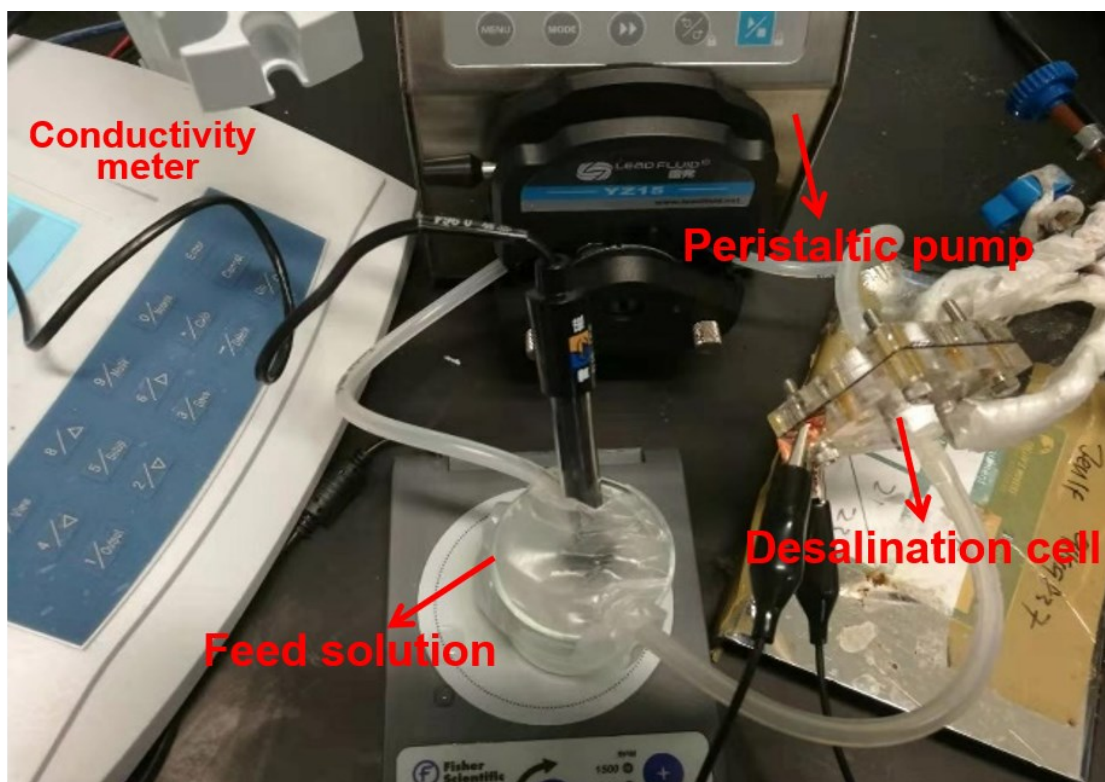

1

2 **Figure S12.** Photograph of the desalination cell configuration.

3

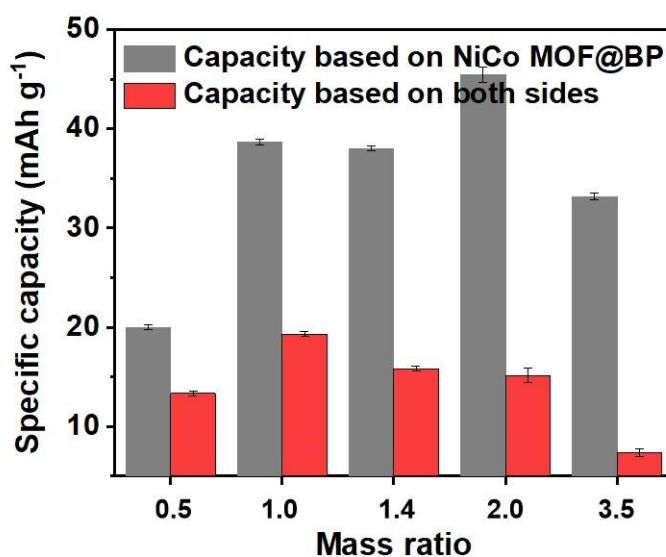

4

5 **Figure S13.** Specific capacity of the desalination battery with different mass ratio of

6 Ag@rGO versus NiCo MOF@BP (red column: capacity calculated based on both side active

1 materials; grey column: capacity calculated based on cathode side active material).

2 **Table S1.** The weight ratio of both electrodes

| Weight ratio | Ag@rGO (mg) | NiCo MOF@BP (mg) |
|--------------|-------------|------------------|
| 0.5          | 2           | 4                |
| 1.0          | 4           | 4                |
| 1.4          | 14          | 10               |
| 2.0          | 20          | 10               |
| 3.5          | 14          | 4                |

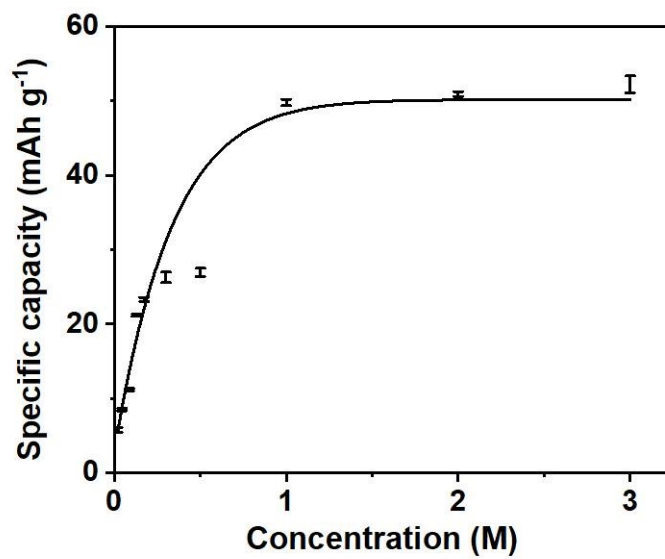

3

4 **Figure S14.** Specific capacity of the desalination battery with different feed concentration.

5

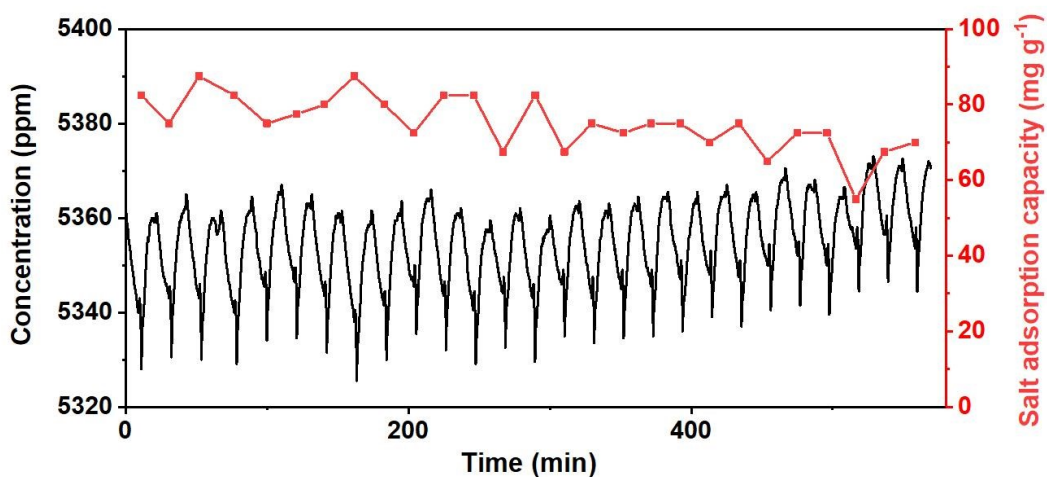

1

2 **Figure S15.** The concentration change profiles and the corresponding salt adsorption capacity  
 3 for the desalination cycles.

4 To further explore the desalination performance of the full cell, this device is tested with a  
 5 current density of  $0.6 \text{ A g}^{-1}$  and about 5000 ppm feed solution under real-time monitoring of  
 6 the conductivity of the effluent. In a typical desalination cycle, the effluent concentration  
 7 changes corresponding to the voltage variation. During the charging process, the sodium ions  
 8 in influent migrate to the cathode materials, resulting in a conductivity decrease in the  
 9 effluent, while chloride ions are removed by the Ag@rGO anode. The salt ions are released  
 10 back into the electrolyte during the discharging process, causing the increase of the effluent  
 11 concentration. As can be noticed, the effluent concentration varies inconsistently with the cell  
 12 potential.

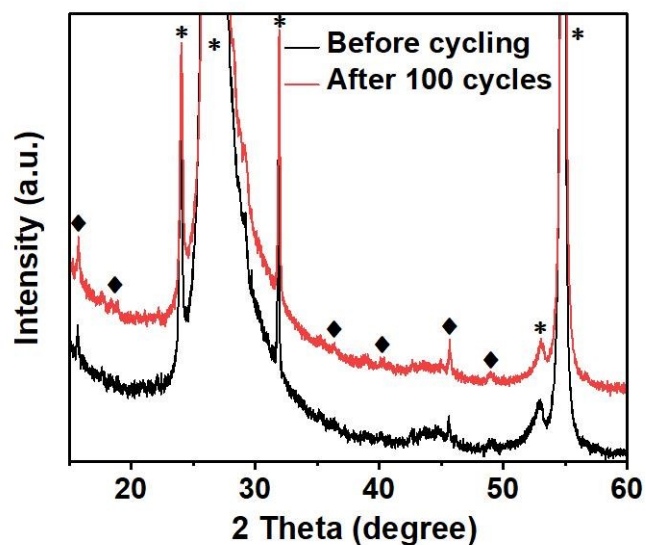

1

2 **Figure S16.** XRD patterns of NiCo MOF@BP electrode before and after long cycling in 2 M  
 3 NaCl solution. The characteristic peaks for graphite paper substrate and NiCo MOF@BP  
 4 nanosheets are marked by asterisk and diamond, respectively.

5 **Table S1.** Comparison of the desalination performance with different desalination system.

| Electrode materials     | Deionization system | Initial TDS (mg L <sup>-1</sup> ) | Salt removal capacity (mg g <sup>-1</sup> ) | Applied voltage (V) | Time (min) | Energy consumption (Wh g <sup>-1</sup> ) | Energy recovery (%) | Published year    |
|-------------------------|---------------------|-----------------------------------|---------------------------------------------|---------------------|------------|------------------------------------------|---------------------|-------------------|
| Activated carbon        | FCDI                | 35000                             | -                                           | 1.2                 | 300        | -                                        | 25                  | 2019 <sup>4</sup> |
| Nickel Hexacyanoferrate | CID                 | 1170                              | 34                                          | 1.5                 | 54         | 0.035                                    | -                   | 2016 <sup>5</sup> |
| Porous carbon           | MCDI                | 1170                              | -                                           | 1.6                 | 4          | 0.260                                    | 40                  | 2012 <sup>6</sup> |
| Porous carbon           | cdi                 | 1170                              | 13                                          | 0.3-1.2             | 40         | 0.236                                    | 30                  | 2015 <sup>7</sup> |
| Porous carbon           | MCDI                | 500                               | -                                           | 1.8                 | 27         | 0.444                                    | 83                  | 2013 <sup>8</sup> |

|                                              |         |       |       |         |      |        |      |                    |
|----------------------------------------------|---------|-------|-------|---------|------|--------|------|--------------------|
| Activated carbon                             | CDI     | 468   | 13    | 1.2     | 20   | 0.342  | -    | 2019 <sup>9</sup>  |
| Activated carbon                             | CDI     | 585   | 10.1  | 1.2     | 45   | 0.154  | 49.6 | 2019 <sup>10</sup> |
| CuFe@NiFe PBA                                | MCDI    | 2925  | 71.8  | 1.0     | 240  | 0.0376 | -    | 2019 <sup>11</sup> |
| N, S-HTPC                                    | CDI     | 500   | 25.95 | 1.2     | 150  |        |      | 2019 <sup>11</sup> |
| Activated carbon                             | FCDI    | 5000  | -     | 2.0     | 500  | 0.25   | 30   | 2019 <sup>12</sup> |
| 3D printed N-doped GO/CNT                    | MCDI    | 2500  | 75    | 1.4     | 100  | 0.331  | 27   | 2019 <sup>13</sup> |
| Activated carbon                             | MCDI    | 2000  | -     | 1.3     | 4    | 0.533  | 40   | 2020 <sup>14</sup> |
| Ti <sub>3</sub> C <sub>2</sub> Tx MXene film | CDI     | 585   | 68    | 1.2     | 166  | 0.24   | 5.44 | 2020 <sup>15</sup> |
| Ferricyanide                                 | MC-RCDI | 5850  | 67.8  | 1.2     | 2h   | 0.553  |      | 2019 <sup>16</sup> |
| Carbon aerogel                               | CDI     | 5200  | 7.1   | 1.3     | ~120 | 0.21   | 30   | 2008 <sup>17</sup> |
| NaI/VCl <sub>2</sub>                         | FCDI    | 19000 | -     | 0.3-1.1 | ~40  | 0.026  | 50   | 2018 <sup>18</sup> |
| Ag coated porous carbon                      | MCDI    | 3900  | 23.2  | 0.7     | 20   | 0.348  | -    | 2017 <sup>19</sup> |
| CNT/graphene                                 | CDI     | 780   | 26.42 | 2       | ~60  | 1.026  |      | 2013 <sup>20</sup> |
| MOF derived porous carbon polyhedra          | CDI     | 500   | 13.86 | 1.2     | 80   |        |      | 2015 <sup>21</sup> |
| NMO                                          | HCDI    | 5850  | 31.2  | 1.2     | 30   |        |      | 2014 <sup>22</sup> |

|                                                                                  |      |       |       |     |                     |  |  |                        |
|----------------------------------------------------------------------------------|------|-------|-------|-----|---------------------|--|--|------------------------|
| 3D Graphene/Metal Oxide Nanoparticle Hybrids                                     | CDI  | 6000  | 24.2  | 1.2 | ~3.8                |  |  | 2013 <sup>2</sup><br>3 |
| Exfoliated MoS <sub>2</sub>                                                      | CDI  | 23400 | 8.81  | 1.2 | 150                 |  |  | 2017 <sup>2</sup><br>4 |
| NiAl-LDH                                                                         | CDI  | 585   | 81.2  | 1.2 | ~100                |  |  | 2014 <sup>2</sup><br>5 |
| Sub-micrometer carbon beads                                                      | CDI  | 29250 | 11.5  | 1.2 | 60                  |  |  | 2017 <sup>2</sup><br>6 |
| K <sub>0.03</sub> Cu[Fe(CN) <sub>6</sub> ] <sub>0.65</sub> ·0.43H <sub>2</sub> O | CDI  | 500   | 23.2  | 1.2 | 100<br>(Half cycle) |  |  | 2018 <sup>2</sup><br>7 |
| N-doped 3D graphene                                                              | CDI  | 86    | 18.6  | 1.2 | ~14                 |  |  | 2017 <sup>2</sup><br>8 |
| N, P, S co-doped hollow carbon polyhedra                                         | CDI  | 500   | 22.19 | 1.2 | 120<br>(Half cycle) |  |  | 2018 <sup>2</sup><br>9 |
| MnO <sub>2</sub>                                                                 | HCDI | 500   | 14.9  | 1.0 | 10                  |  |  | 2018 <sup>3</sup><br>0 |
| MOF/polypyrrole hybrids                                                          | CDI  | 584   | 11.34 | 1.2 | 30<br>(Half cycle)  |  |  | 2019 <sup>3</sup><br>1 |
| Manganese Oxide-Coated, Vertically Aligned CNTs                                  | CDI  | 100   | 28.66 | 1.2 | 40<br>(Half cycle)  |  |  | 2018 <sup>3</sup><br>2 |
| Hierarchical hole-                                                               | CDI  | 572   | 29.6  | 2   | 30<br>(Half         |  |  | 2018 <sup>3</sup>      |

|                                                                                    |      |       |       |     |                  |       |    |                        |
|------------------------------------------------------------------------------------|------|-------|-------|-----|------------------|-------|----|------------------------|
| enhanced 3D graphene                                                               |      |       |       |     | cycle)           |       |    | 3                      |
| 3D intercalated graphene sheet–sphere nanocomposite                                | CDI  | 500   | 22.09 | 1.2 | 120 (Half cycle) |       |    | 2018 <sup>3</sup><br>4 |
| Tunnel structured manganese oxide nanowires                                        | HCDI | 1600  | 27.8  | 1.2 | 15 (Half cycle)  |       |    | 2018 <sup>3</sup><br>5 |
| Porous Cryo-Dried MXene                                                            | CDI  | 10000 | 45    | 1.2 | 7.5 (Half cycle) |       |    | 2018 <sup>3</sup><br>6 |
| Iodide confined in Carbon Nanopores                                                | FDI  | 5850  | 69    | 1   | 1 (Half cycle)   | 0.248 |    | 2018 <sup>3</sup><br>7 |
| Activated carbon                                                                   | HCDI | 60g   | -     | 1.2 | -                | 0.44  | 36 | 2018 <sup>3</sup><br>8 |
| Na <sub>0.44</sub> MnO <sub>2</sub>                                                | MCDI | 890   | 57.4  | 1.5 | 90               |       |    | 2017 <sup>3</sup><br>9 |
| NMO                                                                                | MCDI | 760   | 68.5  | 1.5 | 120              | 0.46  |    | 2017 <sup>4</sup><br>0 |
| Free-Standing Electrodes Derived from Metal–Organic Frameworks/ Nanofibers Hybrids | MCDI | 1000  | 43.3  | 1.4 | 60               |       |    | 2018 <sup>4</sup><br>1 |

|                                                                                  |      |      |       |     |     |       |    |                        |
|----------------------------------------------------------------------------------|------|------|-------|-----|-----|-------|----|------------------------|
| MOF-Derived TiO <sub>2</sub> @Porous Carbon                                      | MCDI | 1500 | 46.7  | 1.4 | 60  | 0.319 |    | 2019 <sup>4</sup><br>2 |
| Bimetallic MOF derived porous carbon                                             | MCDI | 750  | 45.62 | 1.4 | 120 |       |    | 2017 <sup>2</sup>      |
| FePO <sub>4</sub> /RGO                                                           | MCDI | 750  | 100   | 1.4 | 210 | 0.357 | 35 | 2018 <sup>3</sup><br>6 |
| Li <sub>4</sub> Ti <sub>5</sub> O <sub>12</sub> @C                               | MCDI | 2500 | 25    | 1.4 | 120 | 0.284 |    | 2019 <sup>4</sup><br>3 |
| Prussian blue                                                                    | MCDI | 700  | 96    | 1.4 | 30  | 0.079 | 40 | 2017 <sup>4</sup><br>4 |
| Ar plasma modification of 2D MXene Ti <sub>3</sub> C <sub>2</sub> T <sub>x</sub> | CDI  | 500  | 26.8  | 1.4 | 30  |       |    | 2018 <sup>4</sup><br>5 |
| NaTi <sub>2</sub> (PO <sub>4</sub> ) <sub>3</sub> /rGO                           | MCDI | 1000 | 120   | 1.4 | 60  |       |    | 2017 <sup>4</sup><br>6 |
| NaTi <sub>2</sub> (PO <sub>4</sub> ) <sub>3</sub> -AgNPs                         | MCDI | 2500 | 105   | 1.4 | 70  | 0.127 | 30 | 2018 <sup>4</sup><br>7 |
| 3D graphene oxide and polyvinyl alcohol composites                               | CDI  | 250  | 36.1  | 1.2 | 60  |       |    | 2017 <sup>4</sup><br>8 |
| Freestanding PB/Graphene Aerogel                                                 | MCDI | 2500 | 130   | 1.4 | 130 | 0.23  | 39 | 2019 <sup>4</sup><br>9 |
| Na <sub>3</sub> V <sub>2</sub> (PO <sub>4</sub> ) <sub>3</sub> @C                | MCDI | 1000 | 98    | 1.4 | 120 |       |    | 2018 <sup>5</sup><br>0 |
| Na <sub>3</sub> V <sub>2</sub> (PO <sub>4</sub> ) <sub>3</sub> /graphene aerogel | MCDI | 1000 | 107.5 | 1.4 | 105 |       |    | 2019 <sup>5</sup><br>1 |



|               |     |    |       |     |    |       |       |              |
|---------------|-----|----|-------|-----|----|-------|-------|--------------|
| NiCo<br>MOF@P | CDI | 1M | 103.1 | 1.4 | 20 | 0.034 | 67.01 | This<br>work |
|---------------|-----|----|-------|-----|----|-------|-------|--------------|

1

2

### 3 Reference:

- 4 1. A. Favron, F. A. Goudreault, V. Gosselin, J. Groulx, M. Cote, R. Leonelli, J. F. Germain, A.  
5 L. Phaneuf-L'Heureux, S. Francoeur and R. Martel, *Second-Order Raman Scattering in*  
6 *Exfoliated Black Phosphorus*, *Nano letters*, 2018, **18**, 1018-1027.
- 7 2. M. Ding, W. Shi, L. Guo, Z. Y. Leong, A. Baji and H. Y. Yang, *Bimetallic metal–organic*  
8 *framework derived porous carbon nanostructures for high performance membrane capacitive*  
9 *desalination*, *J. Mater. Chem. A*, 2017, **5**, 6113-6121.
- 10 3. S. Zhao, Y. Wang, J. Dong, C.-T. He, H. Yin, P. An, K. Zhao, X. Zhang, C. Gao, L. Zhang, J.  
11 Lv, J. Wang, J. Zhang, A. M. Khattak, N. A. Khan, Z. Wei, J. Zhang, S. Liu, H. Zhao and Z.  
12 Tang, *Ultrathin metal–organic framework nanosheets for electrocatalytic oxygen evolution*,  
13 *Nature Energy*, 2016, **1**.
- 14 4. H. Lim, Y. Ha, H. B. Jung, P. S. Jo, H. Yoon, D. Quyen, N. Cho, C.-Y. Yoo and Y. Cho,  
15 *Energy storage and generation through desalination using flow-electrodes capacitive*  
16 *deionization*, *Journal of Industrial and Engineering Chemistry*, 2020, **81**, 317-322.
- 17 5. S. Porada, P. Bukowska, A. Shrivastava, P. Biesheuvel and K. C. Smith, *Nickel*  
18 *Hexacyanoferrate Electrodes for Cation Intercalation Desalination*, *arXiv preprint*  
19 *arXiv:1612.08293*, 2016.
- 20 6. R. Zhao, P. M. Biesheuvel and A. van der Wal, *Energy consumption and constant current*  
21 *operation in membrane capacitive deionization*, *Energy & Environmental Science*, 2012, **5**,  
22 9520.
- 23 7. T. Kim, J. E. Dykstra, S. Porada, A. van der Wal, J. Yoon and P. M. Biesheuvel, *Enhanced*  
24 *charge efficiency and reduced energy use in capacitive deionization by increasing the*  
25 *discharge voltage*, *Journal of colloid and interface science*, 2015, **446**, 317-326.
- 26 8. P. Dlugolecki and A. van der Wal, *Energy recovery in membrane capacitive deionization*,  
27 *Environmental science & technology*, 2013, **47**, 4904-4910.
- 28 9. Y.-J. Chen, C.-F. Liu, C.-C. Hsu and C.-C. Hu, *An integrated strategy for improving the*  
29 *desalination performances of activated carbon-based capacitive deionization systems*,  
30 *Electrochimica Acta*, 2019, **302**, 277-285.
- 31 10. Y.-W. Chen, J.-F. Chen, C.-H. Lin and C.-H. Hou, *Integrating a supercapacitor with*  
32 *capacitive deionization for direct energy recovery from the desalination of brackish water*,  
33 *Applied Energy*, 2019, **252**, 113417.
- 34 11. Y. Zhao, B. Liang, X. Wei, K. Li, C. Lv and Y. Zhao, *A core–shell heterostructured*  
35 *CuFe@NiFe Prussian blue analogue as a novel electrode material for high-capacity and*  
36 *stable capacitive deionization*, *Journal of Materials Chemistry A*, 2019, **7**, 10464-10474.
- 37 12. C. Zhang, L. Wu, J. Ma, A. N. Pham, M. Wang and T. D. Waite, *Integrated Flow-Electrode*  
38 *Capacitive Deionization and Microfiltration System for Continuous and Energy-Efficient*  
39 *Brackish Water Desalination*, *Environmental science & technology*, 2019, **53**, 13364-13373.
- 40 13. S. Vafakhah, G. J. Sim, M. Saeedikhani, X. Li, P. Valdivia y Alvarado and H. Y. Yang, *3D*

- 1        *printed electrodes for efficient membrane capacitive deionization*, *Nanoscale Advances*, 2019,  
2        **1**, 4804-4811.
- 3 14.    C. Tan, C. He, J. Fletcher and T. D. Waite, *Energy recovery in pilot scale membrane CDI*  
4        *treatment of brackish waters*, *Water research*, 2020, **168**, 115146.
- 5 15.    J. Ma, Y. Cheng, L. Wang, X. Dai and F. Yu, *Free-standing  $Ti_3C_2T_x$  MXene film as binder-*  
6        *free electrode in capacitive deionization with an ultrahigh desalination capacity*, *Chemical*  
7        *Engineering Journal*, 2020, **384**, 123329.
- 8 16.    N. Kim, S. P. Hong, J. Lee, C. Kim and J. Yoon, *High-Desalination Performance via Redox*  
9        *Couple Reaction in the Multichannel Capacitive Deionization System*, *ACS Sustainable*  
10        *Chemistry & Engineering*, 2019, **7**, 16182-16189.
- 11 17.    P. Xu, J. E. Drewes, D. Heil and G. Wang, *Treatment of brackish produced water using*  
12        *carbon aerogel-based capacitive deionization technology*, *Water research*, 2008, **42**, 2605-  
13        2617.
- 14 18.    F. Chen, X. Hou, Q. Liang, X. Hu, Y. Zhou, Q. Ru and S.-J. Hu, *Coupling Desalination and*  
15        *Energy Storage with Redox Flow Electrodes*, *Nanoscale*, 2018, DOI: 10.1039/c8nr02737d.
- 16 19.    H. Yoon, J. Lee, S. Kim and J. Yoon, *Hybrid capacitive deionization with Ag coated carbon*  
17        *composite electrode*, *Desalination*, 2017, **422**, 42-48.
- 18 20.    Y. Wimalasiri and L. Zou, *Carbon nanotube/graphene composite for enhanced capacitive*  
19        *deionization performance*, *Carbon*, 2013, **59**, 464-471.
- 20 21.    Y. Liu, X. Xu, M. Wang, T. Lu, Z. Sun and L. Pan, *Metal-organic framework-derived porous*  
21        *carbon polyhedra for highly efficient capacitive deionization*, *Chemical communications*,  
22        2015, **51**, 12020-12023.
- 23 22.    J. Lee, S. Kim, C. Kim and J. Yoon, *Hybrid capacitive deionization to enhance the*  
24        *desalination performance of capacitive techniques*, *Energy Environ. Sci.*, 2014, **7**, 3683-3689.
- 25 23.    H. Yin, S. Zhao, J. Wan, H. Tang, L. Chang, L. He, H. Zhao, Y. Gao and Z. Tang, *Three-*  
26        *dimensional graphene/metal oxide nanoparticle hybrids for high-performance capacitive*  
27        *deionization of saline water*, *Advanced materials*, 2013, **25**, 6270-6276.
- 28 24.    F. Xing, T. Li, J. Li, H. Zhu, N. Wang and X. Cao, *Chemically exfoliated  $MoS_2$  for capacitive*  
29        *deionization of saline water*, *Nano Energy*, 2017, **31**, 590-595.
- 30 25.    X. Lei, B. Wang, J. Liu, Z. Ye, Z. Chang, M. Jiang and X. Sun, *Three-dimensional NiAl-*  
31        *mixed metal oxide film: preparation and capacitive deionization performances*, *RSC Adv.*,  
32        2014, **4**, 41642-41648.
- 33 26.    B. Krüner, P. Srimuk, S. Fleischmann, M. Zeiger, A. Schreiber, M. Aslan, A. Quade and V.  
34        Presser, *Hydrogen-treated, sub-micrometer carbon beads for fast capacitive deionization with*  
35        *high performance stability*, *Carbon*, 2017, **117**, 46-54.
- 36 27.    S. Choi, B. Chang, S. Kim, J. Lee, J. Yoon and J. W. Choi, *Battery Electrode Materials with*  
37        *Omnivalent Cation Storage for Fast and Charge-Efficient Ion Removal of Asymmetric*  
38        *Capacitive Deionization*, *Advanced Functional Materials*, 2018, DOI:  
39        10.1002/adfm.201802665, 1802665.
- 40 28.    A. M. Abdelkader and D. J. Fray, *Controlled electrochemical doping of graphene-based 3D*  
41        *nanoarchitecture electrodes for supercapacitors and capacitive deionisation*, *Nanoscale*,  
42        2017, **9**, 14548-14557.
- 43 29.    J. Zhang, J. Fang, J. Han, T. Yan, L. Shi and D. Zhang, *N, P, S co-doped hollow carbon*  
44        *polyhedra derived from MOF-based core-shell nanocomposites for capacitive deionization*,

- 1 *Journal of Materials Chemistry A*, 2018, **6**, 15245-15252.
- 2 30. T. Wu, G. Wang, S. Wang, F. Zhan, Y. Fu, H. Qiao and J. Qiu, *Highly Stable Hybrid*  
3 *Capacitive Deionization with a MnO<sub>2</sub> Anode and a Positively Charged Cathode,*  
4 *Environmental Science & Technology Letters*, 2018, **5**, 98-102.
- 5 31. Z. Wang, X. Xu, J. Kim, V. Malgras, R. Mo, C. Li, Y. Lin, H. Tan, J. Tang, L. Pan, Y. Bando,  
6 T. Yang and Y. Yamauchi, *Nanoarchitected metal–organic framework/polypyrrole hybrids*  
7 *for brackish water desalination using capacitive deionization,* *Materials Horizons*, 2019, **6**,  
8 1433-1437.
- 9 32. W. Shi, X. Zhou, J. Li, E. R. Meshot, A. D. Taylor, S. Hu, J.-H. Kim, M. Elimelech and D. L.  
10 Plata, *High-Performance Capacitive Deionization via Manganese Oxide-Coated, Vertically*  
11 *Aligned Carbon Nanotubes,* *Environmental Science & Technology Letters*, 2018, **5**, 692-700.
- 12 33. J. Li, B. Ji, R. Jiang, P. Zhang, N. Chen, G. Zhang and L. Qu, *Hierarchical hole-enhanced 3D*  
13 *graphene assembly for highly efficient capacitive deionization,* *Carbon*, 2018, **129**, 95-103.
- 14 34. Z. U. Khan, T. Yan, L. Shi and D. Zhang, *Improved capacitive deionization by using 3D*  
15 *intercalated graphene sheet–sphere nanocomposite architectures,* *Environmental Science:*  
16 *Nano*, 2018, **5**, 980-991.
- 17 35. B. W. Byles, D. A. Cullen, K. L. More and E. Pomerantseva, *Tunnel structured manganese*  
18 *oxide nanowires as redox active electrodes for hybrid capacitive deionization,* *Nano Energy*,  
19 2018, **44**, 476-488.
- 20 36. W. Bao, X. Tang, X. Guo, S. Choi, C. Wang, Y. Gogotsi and G. Wang, *Porous Cryo-Dried*  
21 *MXene for Efficient Capacitive Deionization,* *Joule*, 2018, **2**, 778-787.
- 22 37. J. Lee, P. Srimuk, S. Carpier, J. Choi, R. L. Zornitta, C. Kim, M. Aslan and V. Presser,  
23 *Confined Redox Reactions of Iodide in Carbon Nanopores for Fast and Energy-Efficient*  
24 *Desalination of Brackish Water and Seawater,* *ChemSusChem*, 2018, **11**, 3460-3472.
- 25 38. A. Rommerskirchen, C. J. Linnartz, D. Müller, L. K. Willenberg and M. Wessling, *Energy*  
26 *Recovery and Process Design in Continuous Flow–Electrode Capacitive Deionization*  
27 *Processes,* *ACS Sustainable Chemistry & Engineering*, 2018, **6**, 13007-13015.
- 28 39. F. Chen, Y. Huang, L. Guo, M. Ding and H. Y. Yang, *A dual-ion electrochemistry*  
29 *deionization system based on AgCl-NMO Electrodes,* *Nanoscale*, 2017, DOI:  
30 10.1039/c7nr01861d.
- 31 40. F. Chen, Y. Huang, L. Guo, L. Sun, Y. Wang and H. Y. Yang, *Dual-ions electrochemical*  
32 *deionization: a desalination generator,* *Energy Environ. Sci.*, 2017, DOI:  
33 10.1039/c7ee00855d.
- 34 41. M. Ding, K. K. R. Bannuru, Y. Wang, L. Guo, A. Baji and H. Y. Yang, *Free-Standing*  
35 *Electrodes Derived from Metal-Organic Frameworks/ Nanofibers Hybrids for Membrane*  
36 *Capacitive Deionization,* *Advanced Materials Technologies*, 2018, **3**, 1800135.
- 37 42. M. Ding, S. Fan, S. Huang, M. E. Pam, L. Guo, Y. Shi and H. Y. Yang, *Tunable*  
38 *Pseudocapacitive Behavior in Metal–Organic Framework-Derived TiO<sub>2</sub>@Porous Carbon*  
39 *Enabling High-Performance Membrane Capacitive Deionization,* *ACS Applied Energy*  
40 *Materials*, 2019, **2**, 1812-1822.
- 41 43. L. Guo, D. Kong, M. E. Pam, S. Huang, M. Ding, Y. Shang, C. Gu, Y. Huang and H. Y. Yang,  
42 *The efficient faradaic Li<sub>4</sub>Ti<sub>3</sub>O<sub>12</sub>@C electrode exceeds the membrane capacitive desalination*  
43 *performance,* *Journal of Materials Chemistry A*, 2019, **7**, 8912-8921.
- 44 44. L. Guo, R. Mo, W. Shi, Y. Huang, Z. Y. Leong, M. Ding, F. Chen and H. Y. Yang, *A*

- 1 *Prussian blue anode for high performance electrochemical deionization promoted by the*  
2 *faradaic mechanism, Nanoscale*, 2017, DOI: 10.1039/c7nr03579a.
- 3 45. L. Guo, X. Wang, Z. Y. Leong, R. Mo, L. Sun and H. Y. Yang, *Ar plasma modification of 2D*  
4 *MXene  $Ti_3C_2T_x$  nanosheets for efficient capacitive desalination*, *FlatChem*, 2018, **8**, 17-24.
- 5 46. Y. Huang, F. Chen, L. Guo and H. Y. Yang, *Ultrahigh performance of a novel*  
6 *electrochemical deionization system based on a  $NaTi_2(PO_4)_3/rGO$  nanocomposite*, *J. Mater.*  
7 *Chem. A*, 2017, DOI: 10.1039/c7ta03725b.
- 8 47. Y. Huang, F. Chen, L. Guo, J. Zhang, T. Chen and H. Y. Yang, *Low energy consumption*  
9 *dual-ion electrochemical deionization system using  $NaTi_2(PO_4)_3-AgNPs$  electrodes*,  
10 *Desalination*, 2018, DOI: 10.1016/j.desal.2018.02.006.
- 11 48. Z. Y. Leong, G. Lu and H. Y. Yang, *Three-dimensional graphene oxide and polyvinyl alcohol*  
12 *composites as structured activated carbons for capacitive desalination*, *Desalination*, 2017,  
13 DOI: 10.1016/j.desal.2017.07.018.
- 14 49. S. Vafakhah, L. Guo, D. Sriramulu, S. Huang, M. Saeedikhani and H. Y. Yang, *Efficient*  
15 *Sodium-Ion Intercalation into the Freestanding Prussian Blue/Graphene Aerogel Anode in a*  
16 *Hybrid Capacitive Deionization System*, *ACS applied materials & interfaces*, 2019, **11**, 5989-  
17 5998.
- 18 50. W. Zhao, L. Guo, M. Ding, Y. Huang and H. Y. Yang, *Ultrahigh-Desalination-Capacity*  
19 *Dual-Ion Electrochemical Deionization Device Based on  $Na_3V_2(PO_4)_3@C-AgCl$  Electrodes*,  
20 *ACS applied materials & interfaces*, 2018, **10**, 40540-40548.
- 21 51. W. Zhao, M. Ding, L. Guo and H. Y. Yang, *Dual-Ion Electrochemical Deionization System*  
22 *with Binder-Free Aerogel Electrodes*, *Small*, 2019, **15**, e1805505.

23

24
